# Supplementary material for: Molecular insight to size and dose-dependent cellular toxicity exhibited by a green synthesized bioceramic nanohybrid with macrophages for dental applications
Source: Royal Society of Chemistry journal article supplement (doi:10.1039/c8tx00112j), 2018-01-01
Supplement: c8tx00112j1.pdf [file c8tx00112j1.pdf]

## Supplementary Information

### **Molecular insight to size and dose dependent cellular toxicity exhibited by green synthesized Bioceramic nanohybrid with Macrophages for dental application**

<sup>1</sup>Hardik Makkar<sup>□</sup>, <sup>2</sup>Suresh K Verma<sup>□</sup>, <sup>3</sup>Pritam Kumar Panda, <sup>4</sup>Nandini Pramanik, <sup>5</sup>Ealisha Jha

<sup>1,2</sup> Mrutyunjay Suar\*

<sup>1</sup>KIIT Technology Business incubator, KIIT University, Bhubaneswar, Orissa, 751024, India

<sup>2</sup>School of Biotechnology, KIIT University, Bhubaneswar, Orissa, 751024, India

<sup>3</sup>University of Freiburg, Division of Paediatric Haematology and Oncology, Freiburg, 79106, Germany

<sup>4</sup>Advance Science and Technology Research Centre, Vinoba Bhave University, Hazaribagh, Jharkhand, 825301, India

<sup>5</sup>Memorial University of Newfoundland, Department of Physics and Physical Oceanography, St. John's, Newfoundland and Labrador, NL A1C 5S7 Canada

\*Corresponding author

<sup>□</sup> These authors have contributed equally as first author.

Supplementary figures:

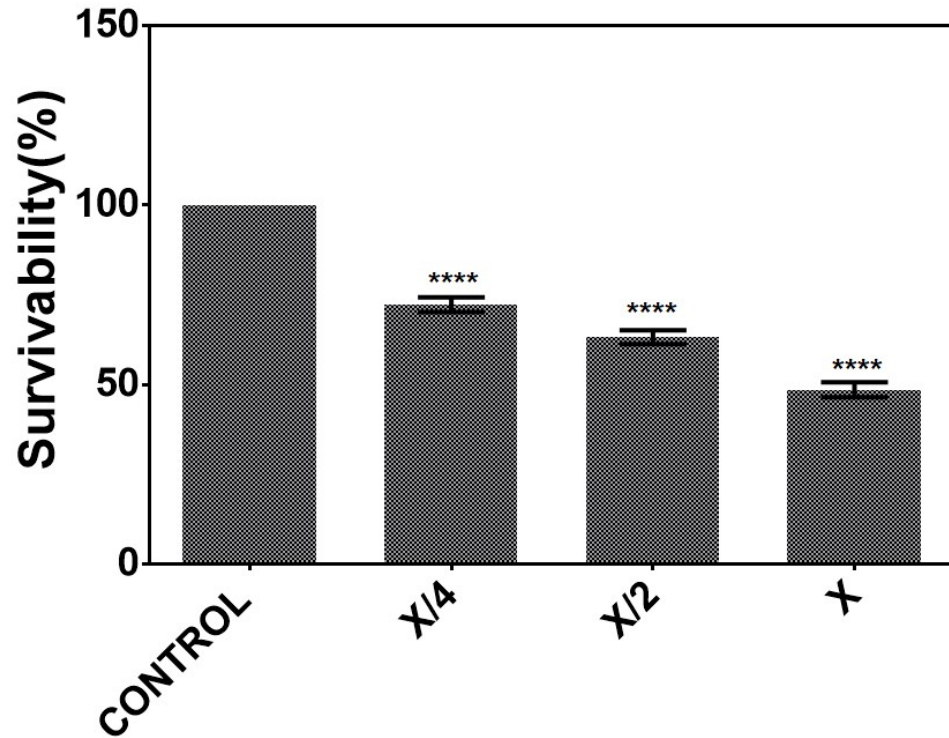

**Figure S1:** Survivability of RAW 264.7 cells exposed to MTA . All the experiments were done in triplicates and data were presented as mean  $\pm$  SD of three independent experiments. Statistical analyses were performed using GraphPad Prism v6.01 (San Diego, California). 2-way ANOVA was used for data significance with significance set at  $P < 0.05$ . Differences between groups were analyzed by Tukey test for multiple comparisons. \* $P < 0.05$  denotes significant change from Bulk particles, Number of \* presents the degree of significance.

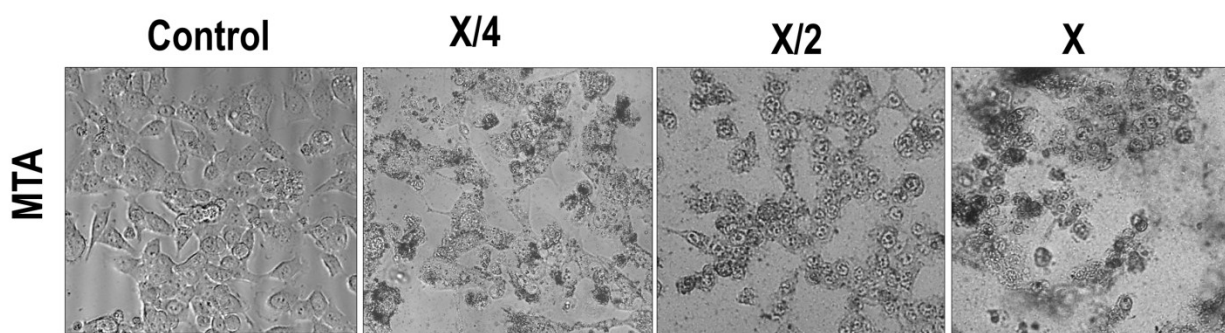

**Figure S2 :** Mophological changes in RAW264.7 cells exposed to MTA at different concentration.
